# Supplementary material for: Simultaneous quantification of uranium(vi), samarium, nitric acid, and temperature with combined ensemble learning, laser fluorescence, and Raman scattering for real-time monitoring
Source: Royal Society of Chemistry journal article supplement (doi:10.1039/d2an00998f), 2022-01-01
Supplement: d2an00998f1.pdf [file d2an00998f1.pdf]

Simultaneous quantification of uranium(VI), samarium, nitric acid, and temperature with combined ensemble learning, laser fluorescence and Raman scattering for real-time monitoring

*Luke R. Sadergaski, Hunter B. Andrews*

Radioisotope Science and Technology Division, Oak Ridge National Laboratory, 1 Bethel  
Valley Road, Oak Ridge, TN, 37830, USA

**This Supporting Information contains:**

Pages: 10

Figures: 8

Tables: 3

### *Extended methods description*

**Steady-state excitation.** An excitation spectrum is analogous to an absorbance spectrum. Excitation spectra are acquired when the emission wavelength is fixed and the excitation monochromator wavelength is scanned. The spectrum provides information about the wavelengths the molecule will absorb and emits a photon at a particular wavelength. Excitation spectra are more sensitive to specific species than an absorption spectrum, which measures all absorbing species in a solution.

**Statistical model comparisons.** The Tukey-Kramer method was used for the pairwise comparison of model RMSEPS for each factor, assuming the null hypothesis  $H_0: \mu_i = \mu_j$ . The RMSEP was separated into bias and standard error of prediction (SEP) using equations 1 and 2, respectively, and compared using a 95%  $t$  confidence interval.

$$bias = \frac{1}{n} \sum_{i=1}^n e_i \quad (1)$$

$$SEP = \sqrt{\frac{\sum_{i=1}^n (e_i - bias)^2}{n - 1}} \quad (2)$$

$$e_i = (\hat{y}_i - y_i) \quad (2a)$$

At the level  $\alpha = 0.05$ , a type I error, falsely rejecting  $H_0$ , is made 5% of the time. To minimize this possibility, the critical  $t$  value was adjusted to account for  $\alpha$  inflation and avoid inaccurate significant results. Prediction biases between two models were calculated at the 95% confidence interval using equation 3. The value  $s_e$  represents the standards error of the estimated difference where  $d_i$  is the difference in error between models being compared and  $\bar{d}$  is the mean difference in error between the compared models. This was calculated with equation 4.

$$bias_1 - bias_2 \pm t_{n-1,0.025} \times s_e \quad (3)$$

$$s_e = \sqrt{\frac{\sum_{i=1}^n (d_i - \bar{d})^2}{n \times (n-1)}} \quad (4)$$

Equations 5 and 6 were used to evaluate the 95% t confidence interval for the model SEPs. The value r represents the correlation coefficient between  $e_1$  and  $e_2$ . The confidence interval was calculated using equation 5. If the confidence interval of the SEP ratios corresponding to two models contained the integer 1, they were not considered statistically different. The overall prediction performance of two models was considered statistically similar if the bias confidence interval contained 0 and the SEP ratio contained 1.

$$K = 1 + \frac{2(1-r^2) \times t_{n-2,0.025}^2}{n-2} \quad (5)$$

$$L = \sqrt{K + \sqrt{(K^2 - 1)}} \quad (6)$$

$$\frac{SEP_1}{SEP_2} \times \frac{1}{L} \text{ and } \frac{SEP_1}{SEP_2} \times L \quad (7)$$

### Python Libraries.

Links to the open-source documentation for the Python packages employed are provided below.

Savitzky-Golay Filter:

[https://docs.scipy.org/doc/scipy/reference/generated/scipy.signal.savgol\\_filter.html](https://docs.scipy.org/doc/scipy/reference/generated/scipy.signal.savgol_filter.html)

Random Forrest:

<https://scikit-learn.org/stable/modules/generated/sklearn.ensemble.RandomForestRegressor.html>

Stacked Regression:

<https://scikit-learn.org/stable/modules/generated/sklearn.ensemble.StackingRegressor.html>

Partial Least Squares Regression:

[https://scikit-learn.org/stable/modules/generated/sklearn.cross\\_decomposition.PLSRegression.html](https://scikit-learn.org/stable/modules/generated/sklearn.cross_decomposition.PLSRegression.html)

Ridge Regression:

[https://scikit-learn.org/stable/modules/generated/sklearn.linear\\_model.RidgeCV.html](https://scikit-learn.org/stable/modules/generated/sklearn.linear_model.RidgeCV.html)

Extreme Gradient Boosted Regression:

[https://xgboost.readthedocs.io/en/stable/python/python\\_api.html#module-xgboost.sklearn](https://xgboost.readthedocs.io/en/stable/python/python_api.html#module-xgboost.sklearn)

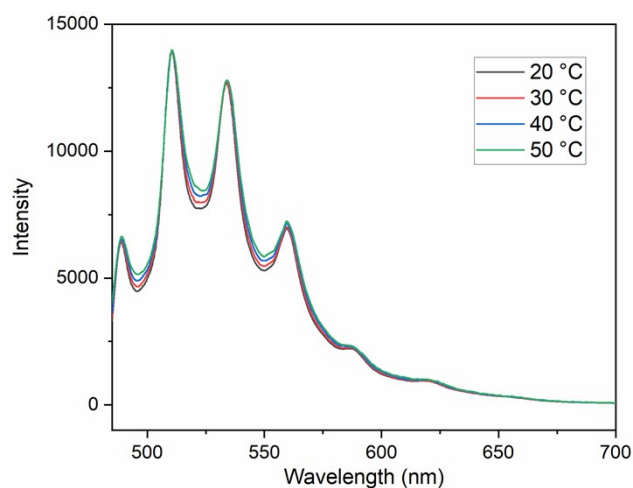

**Figure S1.** Normalized uranyl temperature fluorescence spectra based on the 510.3 nm peak.

Sample contained  $100 \mu\text{g}\cdot\text{mL}^{-1}$  U(VI) and 1 M  $\text{HNO}_3$ . Note the peaks sharpen slightly but have similar shape.

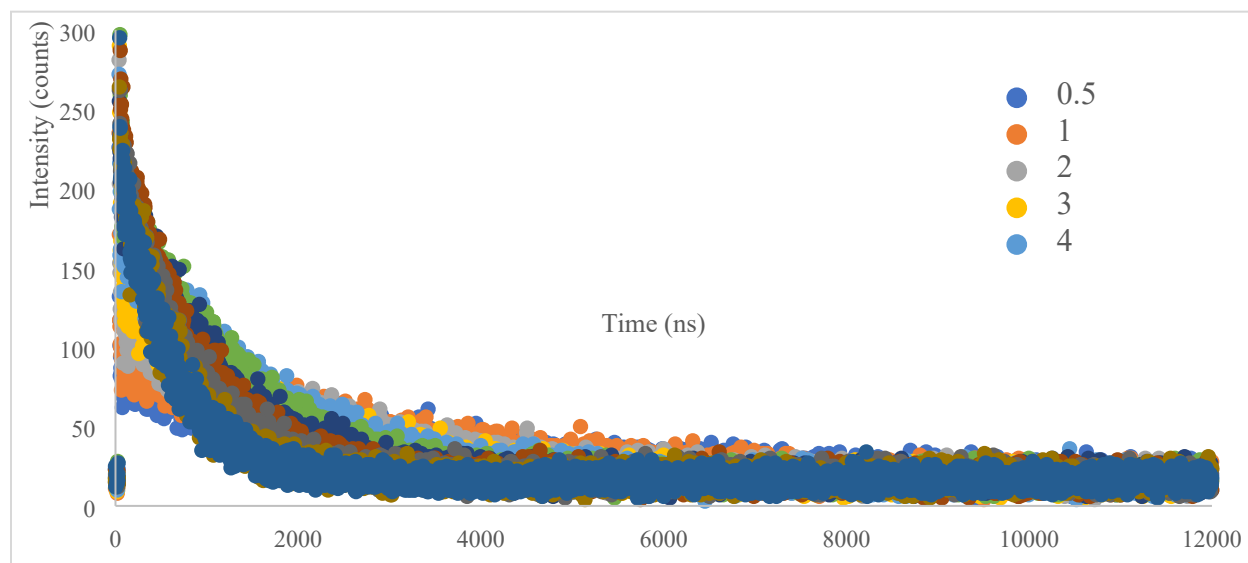

**Figure S2.** Fluorescence decay curves for solutions containing  $100 \mu\text{g}\cdot\text{mL}^{-1}$  U(VI) with varying nitric acid concentration (0.5–12 M).

**Table 1.** U(VI) fluorescence lifetimes with changing nitric acid concentration.

| <b>HNO<sub>3</sub> (M)</b> | <b>Lifetime (μs)</b> |
|----------------------------|----------------------|
| 0.5                        | 3.1                  |
| 1                          | 2.8                  |
| 2                          | 2.1                  |
| 3                          | 1.7                  |
| 4                          | 1.4                  |
| 5                          | 1.1                  |
| 6                          | 0.98                 |
| 7                          | 0.82                 |
| 8                          | 0.72                 |
| 10                         | 0.61                 |
| 12                         | 0.55                 |

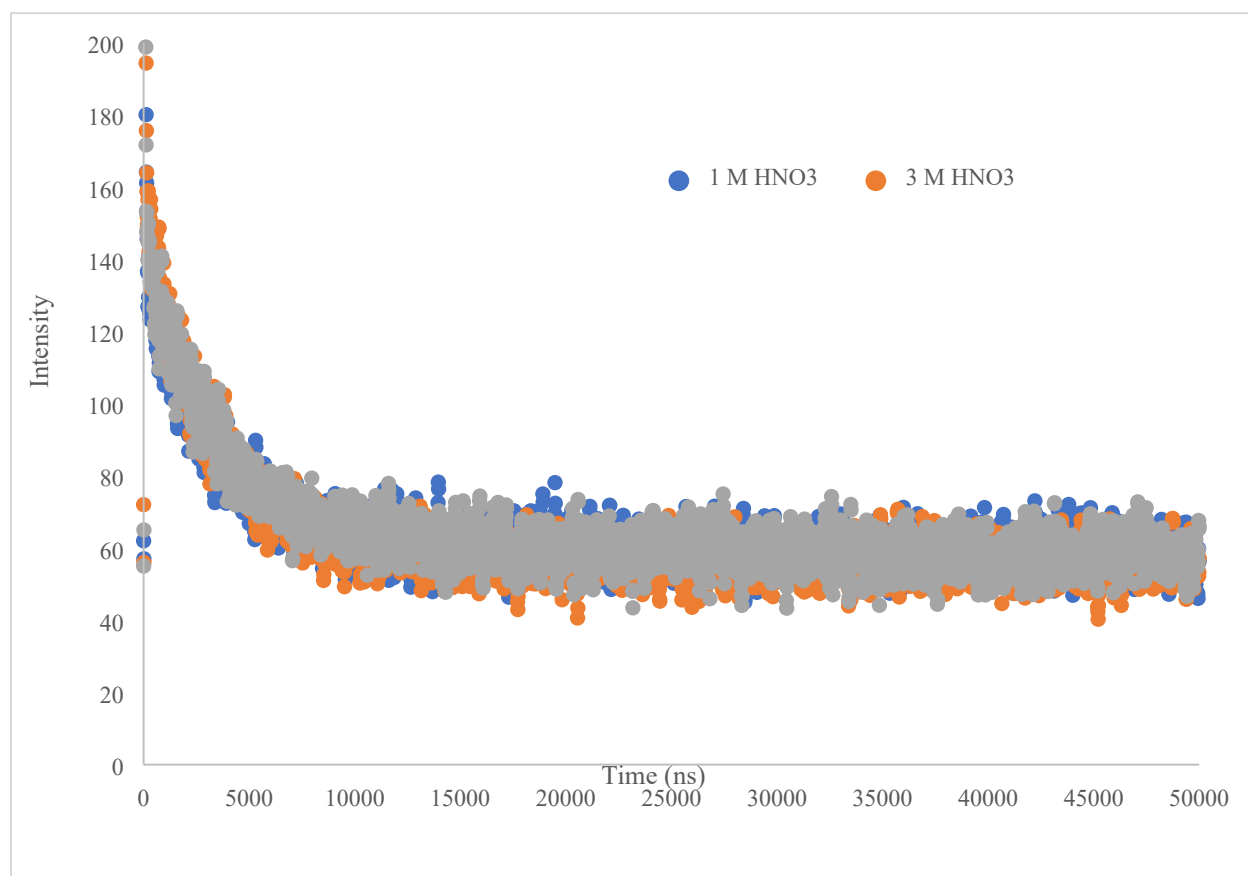

**Figure S3.** Decay curves for samples containing 200 μg·mL<sup>-1</sup> Sm(III) and nitric acid.

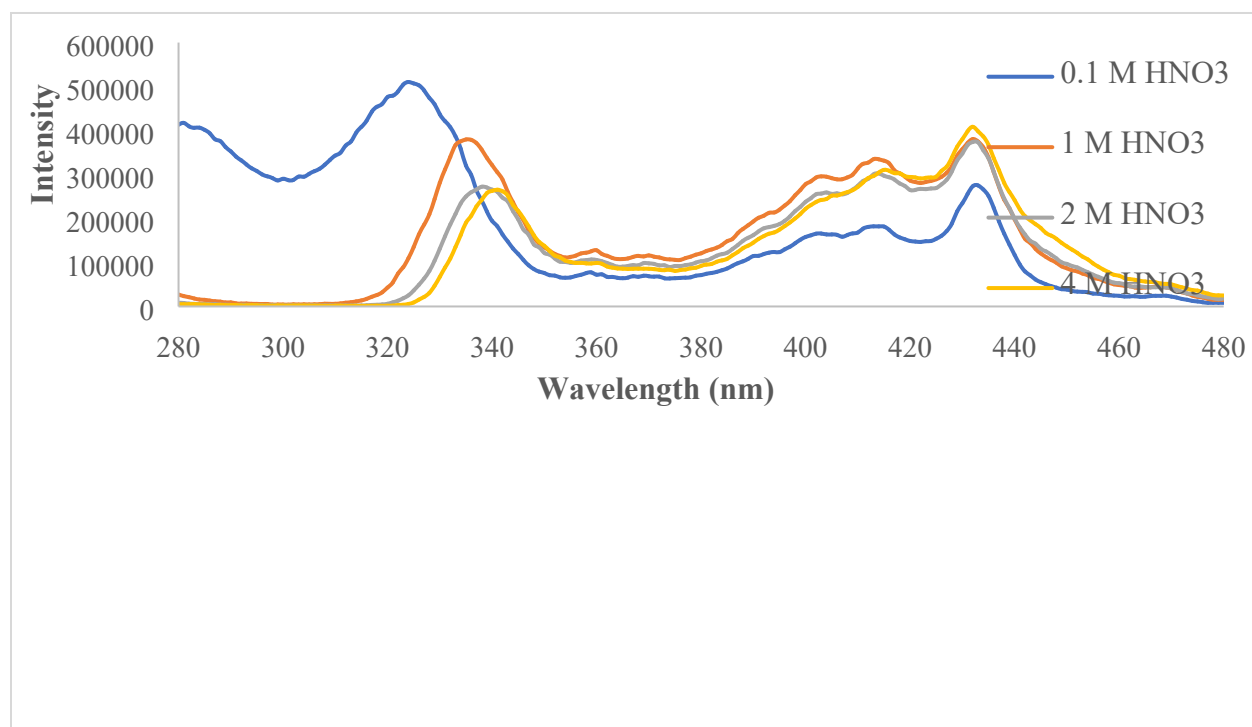

**Figure S4.** Excitation spectra of solutions containing 100  $\mu\text{g}\cdot\text{mL}^{-1}$  U(VI) and HNO<sub>3</sub> (0.1–4 M).

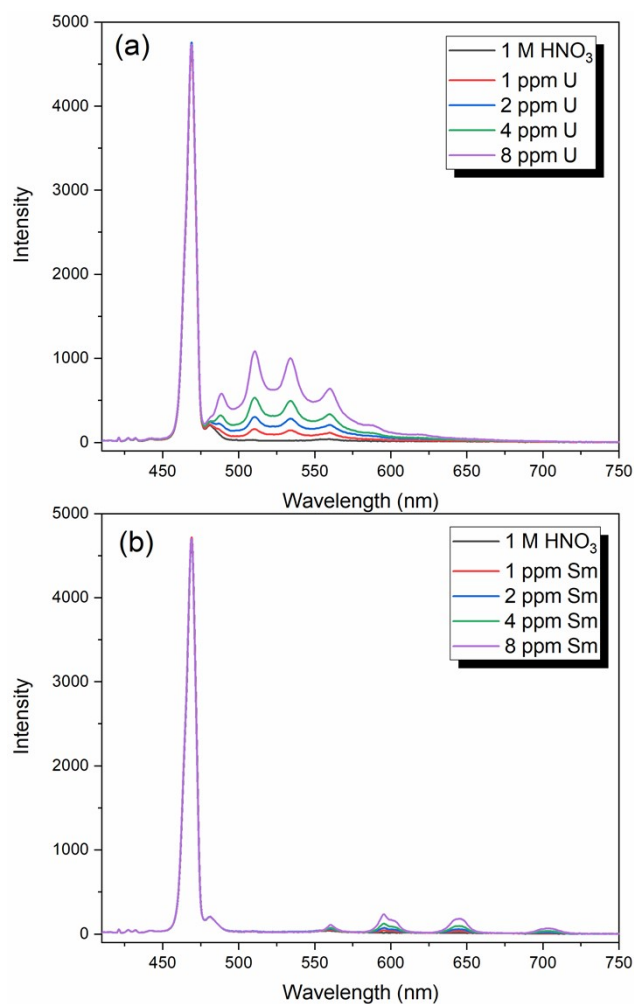

**Figure S5.** Laser-induced fluorescence spectroscopy spectra ( $\lambda_{\text{ex}} = 405 \text{ nm}$ ) of solutions containing  $1\text{--}8 \mu\text{g}\cdot\text{mL}^{-1}$  uranium(VI) (a) and  $1\text{--}8 \mu\text{g}\cdot\text{mL}^{-1}$  Sm(III) (b) with constant acid concentration ( $1.0 \text{ M HNO}_3$ ).

**Table S2.** D-optimal design matrix for sample temperatures.

| Run | Temp. (°C) | Space type | Build type  |
|-----|------------|------------|-------------|
| 1   | 20         | Vertex     | Model       |
| 2   | 26.25      | AxialCB    | Lack of fit |
| 3   | 32.5       | Center     | Model       |
| 4   | 38.75      | AxialCB    | Lack of fit |
| 5   | 45         | Vertex     | Model       |

*Note:* Abbreviations used in this table are temperature (Temp.).

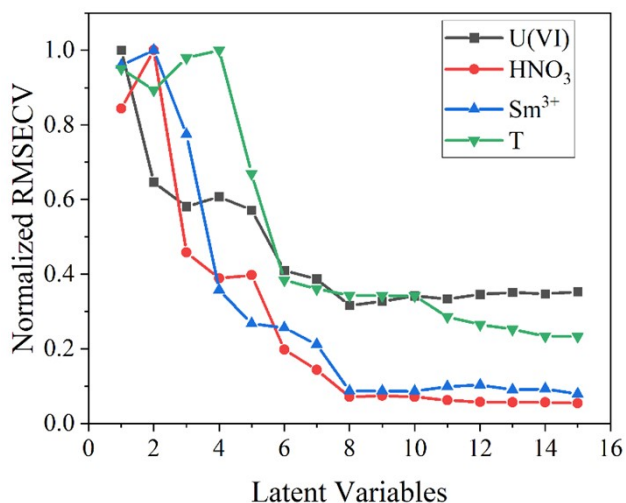

**Figure S6.** Normalized RMSECV vs. the number of factors (i.e., latent variables) included in the initial partial least squares regression (PLSR) model. Here, all factors were modeled simultaneously using the PLS-2 approach.

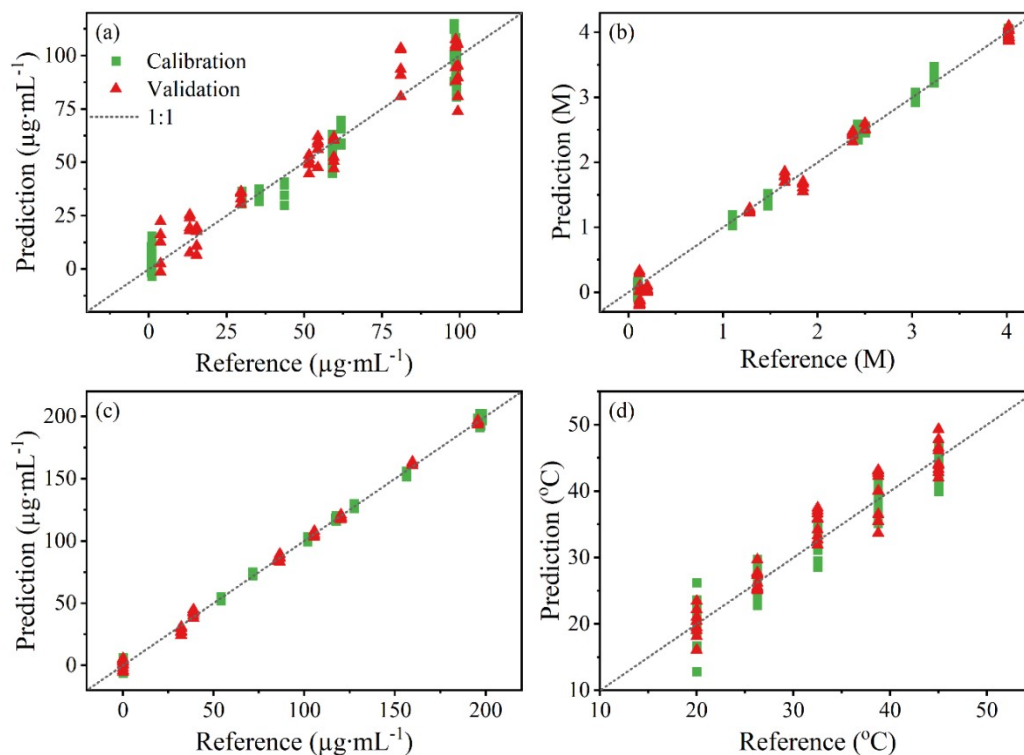

**Figure S7.** Parity plots from initial PLS model for (a) U(VI) concentration, (b)  $\text{Sm}^{3+}$  concentration, (c) nitric acid concentration, and (d) temperature and eight latent variables.

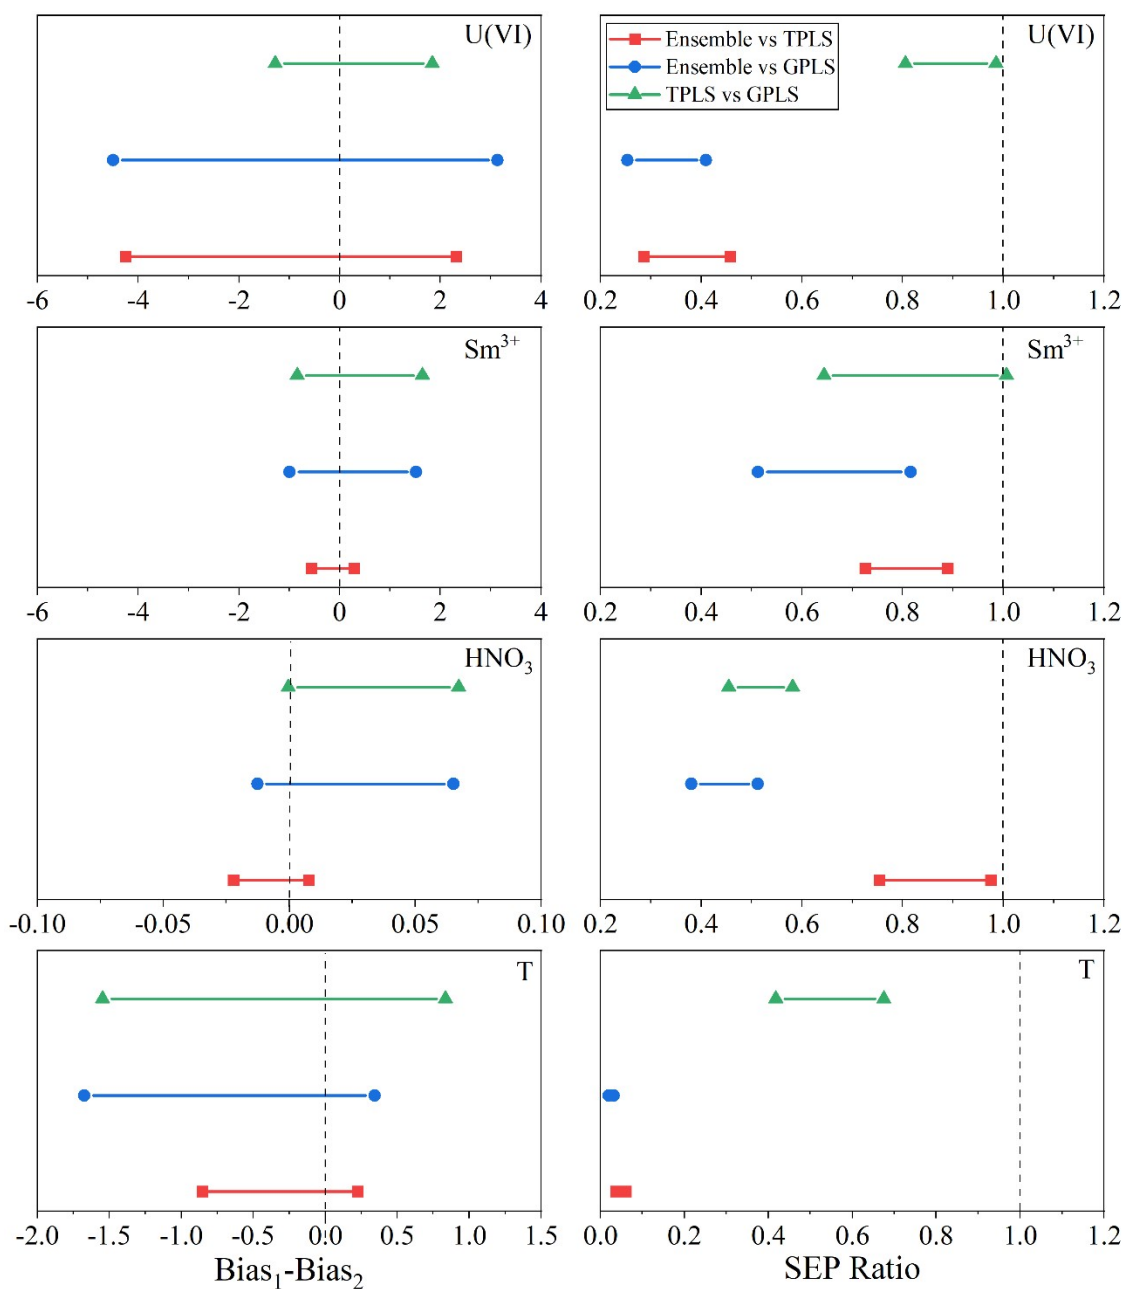

Figure S8. Bias and standard error of prediction (SEP) 95% confidence bands from the Tukey Kramer tests. All models were determined to be significantly different from one another, with the exception of the global PLSR (GPLS) and trimmed PLSR (TPLS) models for  $\text{Sm}^{3+}$ .

**Table S3.** Root-mean-square error of the prediction values for each species with various combinations of lack-of-fit (LOF) points included in the calibration set.

| <b>Combination</b> | <b>LOF points</b> | <b>Temp.<br/>(°C)</b> | <b>HNO<sub>3</sub><br/>(M)</b> | <b>Sm(III)<br/>(µg·mL<sup>-1</sup>)</b> | <b>U(VI)<br/>(µg·mL<sup>-1</sup>)</b> |
|--------------------|-------------------|-----------------------|--------------------------------|-----------------------------------------|---------------------------------------|
| 1 LOF              | 14                | 0.67                  | 0.083                          | 2.22                                    | 3.89                                  |
| 2 LOF              | 14,20             | 0.71                  | 0.067                          | 2.36                                    | 3.30                                  |
| 3 LOF              | 1,13,19           | 0.62                  | 0.061                          | 1.94                                    | 3.01                                  |
| 4 LOF              | 1,14,19,20        | 0.29                  | 0.061                          | 1.91                                    | 2.56                                  |
| 5 LOF              | 1,14,19,20,24     | 0.18                  | 0.070                          | 2.03                                    | 2.58                                  |
